# Supplementary material for: Clopidogrel versus ticagrelor in the treatment of Chinese patients undergoing percutaneous coronary intervention: effects on platelet function assessed by platelet function tests and mean platelet volume
Source: PubMed Central journal article supplement (PMC8650403; doi:10.1186/s12959-021-00350-2), 2021-12-07
Supplement: 12959_2021_350_MOESM3_ESM.pdf [file 12959_2021_350_MOESM3_ESM.pdf]

**Table S1. Multivariate regression analysis for prediction of HPR at LTA and VASP assay.<sup>a</sup>**

| Variables                        | LTA                        |              | VASP assay                 |                  |
|----------------------------------|----------------------------|--------------|----------------------------|------------------|
|                                  | OR (95% CI)                | P            | OR (95% CI)                | P                |
| <b>dual antiplatelet therapy</b> | <b>0.048(0.004, 0.531)</b> | <b>0.013</b> | <b>0.033(0.007, 0.163)</b> | <b>&lt;0.001</b> |

<sup>a</sup> Adjusted for previous of percutaneous coronary intervention, previous of stroke, MPV, hsCRP, left ventricular ejection fraction, and aspartate transaminase.

HPR, high on-treatment platelet reactivity; MPV, mean platelet volume.
