# Supplementary material for: Clopidogrel versus ticagrelor in the treatment of Chinese patients undergoing percutaneous coronary intervention: effects on platelet function assessed by platelet function tests and mean platelet volume
Source: Springer Nature journal article supplement (doi:10.1186/s12959-021-00350-2), 2021-12-07
Supplement: MOESM1 [file 19938480]

## Additional file 1

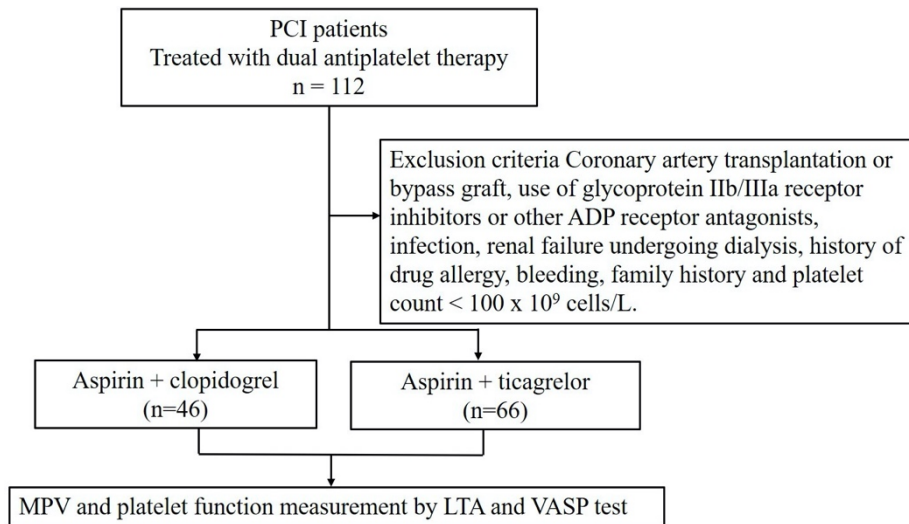

**Fig. S1. Study flow diagram.**

Abbreviations: PCI, percutaneous coronary intervention; MPV, mean platelet volume; LTA, light transmission aggregometry; VASP, vasodilator-stimulated phosphoprotein.
